# Supplementary material for: Wheat and Faba Bean Intercropping Together with Nitrogen Modulation Is a Good Option for Balancing the Trade-Off Relationship between Grain Yield and Quality in the Southwest of China
Source: MDPI journal article supplement (doi:10.3390/agronomy12122984), 2022-11-28
Supplement: s1 [file s1]

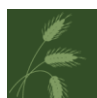

Supplementary Table Soil total nitrogen and available nitrogen contents in the each treatment at soil depths of 0-20cm before the start of the experiment of 2018–2019.

|         | Total Nitrogen (g/kg) |          | Available Nitrogen (mg/kg) |           |
|---------|-----------------------|----------|----------------------------|-----------|
|         | MW                    | IW       | MW                         | IW        |
| N0      | 1.1 Bc                | 1.14 ABc | 85.87 Bb                   | 92.21 Ab  |
| N1      | 1.16 Bb               | 1.22 Ab  | 89.13 Bab                  | 95.67 Aab |
| N2      | 1.22 Aa               | 1.25 Ab  | 93.95 Aa                   | 98.93 Aa  |
| N3      | 1.27 Aa               | 1.28 Aa  | 94.00 Ba                   | 98.47 Aa  |
| Average | 1.19 A                | 1.22 A   | 90.74 B                    | 96.32 A   |

MW, mono-cropped wheat; IW, intercropping wheat. Values with different lower case letters are significantly different among N levels, and values with different capital letters are significantly different between planting pattern under the same N level (two-way ANOVA,  $p < 0.05$ ).
