# Supplementary material for: Wheat and Faba Bean Intercropping Together with Nitrogen Modulation Is a Good Option for Balancing the Trade-Off Relationship between Grain Yield and Quality in the Southwest of China
Source: MDPI journal article supplement (doi:10.3390/agronomy12122984), 2022-11-28
Supplement: s1 [file s1]

Archive with 1 entries (1 files):
- agronomy-1992558-supplementary.pdf
